# Supplementary material
Source: Research Square preprint supplement (doi:10.21203/rs.3.rs-9227696/v1)
Supplement: Supplementary file 1 [file 05d3508c922b350f051dbd43.docx]

# Appendices

| ***Appendix A: Stakeholder Categorisation*** | | | | | | | | | |
| --- | --- | --- | --- | --- | --- | --- | --- | --- | --- |
| Stakeholders | Code | Group | Role | Objectives | Level | Type | Resources | Level of Interest | Sources |
| Department for Energy Security and Net Zero (DESNZ), Department for Levelling Up, Housing and Communities (DLUHC)  UK Green Building Council (UKGBC), Local Authorities & City Councils  Property Developers, Building Contractors, Engineers, Architects    Digital Twin Software Developers, IoT and AI Companies, BIM Vendors  Banks and Green Investment Funds, Venture Capitalists, Real Estate Investment Trusts (REITs)  Homeowners, Landlords, Commercial Real Estate Owners  Universities & Research Labs, Think Tanks  National Grid, Renewable Energy Companies | G1  G2  C1  T1  F1  O1  A1  U1 | Government  Policy Makers  Construction & Built Environment  Technology & Digital  Twin Providers  Investors & Financial Institutions  Building Owners & Tenants  Academia & Research Institutions  Energy & Utility Providers | Promoter and Coordinator  Enforcer and Mediator  Implementers and Allies  Promoters and Advocates  Risk Managers and Gatekeepers  Beneficiaries and Influencers  Coordinators and Knowledge Brokers  Allies and Mediator | Ensure policy coherence, reduce national emissions, expand retrofit scale  Ensure retrofit compliance, support energy strategy, promote technical standards  Maximise profitability, reduce technical risk  Adoption and standardisation of their tech  Secure ROI, minimise investment risk  Reduce bills, improve asset value  Pilot and test DT for retrofit use cases  Grid resilience, load optimisation | National  National/Local  National  National  National  Local  National  National | Political/Bureaucratic  Technical Experts / Bureaucratic  Special Interests / Technical  Experts / Private Innovators  Economic / Private Sector  Special Interests/ General Public  Experts/ Academic  Technical Infrastructure Providers | Political, Economic, Legal  Political, Legal, Cognitive  Economic, Technical  Economic, Cognitive  Economic  Economic, Legal  Cognitive  Economic, Technical | High  High  High  High  Medium  Medium  Medium  Medium | *(Okimi et al. 2024)*  *(Okimi et al. 2024)*  *(Doukari and Suliman 2024)*  *(Zdunek 2024)*  *(Sobowale et al. 2023)*  *(Ammar et al. 2022)*  *(Saback et al. 2023)*  *(Kaewunruen et al. 2019)* |

*Appendix B. Primary Studies Summary*

| ***Study*** | *Scope and Contribution* |
| --- | --- |
| *Jradi et al. (2023)* | *Developed a digital twin framework for energy retrofit decision-making, providing detailed technical and economic barrier analysis applicable to the UK context* |
| *Sobowale et al. (2023)* | *Conducted a systematic review of DT applications for predictive maintenance in existing UK buildings, highlighting current use cases and limitations* |
| *Elghaish et al. (2024)* | *Provided a critical review of AI-IoT-DT integration for net-zero carbon buildings, emphasising the roles of data automation and predictive modelling* |
| *Zhu et al. (2024)* | *Conducted an industry-focused study on overcoming barriers to digital twin deployment in construction, discussing policy interventions to accelerate adoption* |

| ***Appendix C: CLD Variable Definitions*** | | | | | | |
| --- | --- | --- | --- | --- | --- | --- |
| Variable Name | Definition | Measurement / Unit | Source (Reference) | Role in CLD | Aggregation | Direct Quote from Source |
| Energy Renovation Rate | The percentage of existing building stock undergoing energy retrofit annually. | % of building stock renovated per year | *(Jradi, et al. 2023)* | System Output | Retrofit policy implementation, investment levels, retrofit demand | “Only about 1% of the building stock undergoes energy renovations each year” |
| Energy Optimization Capability | The implementation of AI- and IoT-enabled energy management and automation platforms that optimize heating, cooling, and electricity usage to achieve net-zero goals. | % of retrofitted buildings using smart optimization platforms; energy saved per m² (kWh/m²/year); CO2‚ reduction (kgCO2eq/a) | *(Elghaish, F. et al. 2024)* | Driver | Energy automation, real-time optimisation, AI integration in DT, smart HVAC and energy systems | “Deena et al. (2022) used DT to develop an intelligent optimisation and automation system to manage energy to meet NZEB requirements in buildings.” |
| Building Data Availability | The extent to which buildings are equipped with digital systems (e.g., sensors, meters, IoT) that generate real-time operational data for analysis and optimisation. | % of buildings with active digital data collection systems | *(Jradi, et al. 2023)* | Driver | Use of IoT sensors, installation of energy meters, sensor-data integration platforms, digital building monitoring systems, Availability of Retrofit Design and Assessment Tools | “Acquisition, storage, integration, management, and exchange of building data from various sensors, meters, and IoT devices.” |
| Digital Twin Adoption Rate | The extent to which Digital Twin solutions are implemented in building projects (especially retrofits), relative to their potential use. | % of retrofit projects using DT tools; market penetration of DT in construction | *(Jradi, et al. 2023)* | Barrier (currently low adoption) | Includes: DT deployment in existing building stock, industry integration rate, retrofit-specific DT solutions | “However, their adoption in the building and construction sectors is still in its early stages, with limited focus on existing buildings or highly energy-efficient structures.” |
| Government Incentives and Funding | Availability of public funding, financial support, pilot programs, or preferential procurement to reduce barriers and encourage Digital Twin adoption in retrofit projects. | Total funding (£), number of DT-supported schemes, % of retrofits receiving public subsidy, presence of government-led DT pilots. | *(Zhu et al. 2024)* | Driver | financial subsidies, procurement policy reforms, pilot project funding, training grants, and technical support mechanisms | “The government can offer financial and technical support for DT implementation to achieve energy savings.” |
| Technical Capacity of Building Professionals | The level of understanding among retrofit decision-makers (e.g., engineers, contractors, policymakers, building owners) of what Digital Twins are, how they function, and the benefits they offer across the retrofit lifecycle. | % of workforce trained in Digital Twin; # of certifications; industry readiness index | *(Sobowale, M. et al. 2023)* | Barrier | Training programs, technical literature, survey data | “Practitioners, O&M managers, and academics… need more proper knowledge and technical expertise on digital twins” |
| Availability of Simulation-Based Retrofit Tools | The modelling fidelity and real-time responsiveness of energy retrofit planning platforms | % of dynamic tools; tool performance rating | *(Jradi, et al. 2023)* | Barrier | Legacy tool usage, static simulation reliance, modelling feedback capability, expert system availability | “Retrofit support tools are based on pre-simulated data or static assumptions… leading to performance gap.” |
| Quality of Retrofit Decision-Making | The degree to which retrofit strategies and decisions are informed by accurate data, validated models, and interdisciplinary inputs. | % of projects using validated digital tools; expert audit scores; retrofit error rates | *(Jradi, et al. 2023)* | Barrier | Data quality, stakeholder coordination, decision traceability, simulation precision | “Due to inaccurate calculations and poor decision-making, retrofitted buildings contain faults and malfunctions…” |
| Synchronous Energy Prediction using AI | The ability of machine learning models to continuously predict real-time energy usage using streaming data | Forecasting accuracy (%), real-time update interval (seconds), model latency (ms) | *(Elghaish, F. et al. 2024)* | Driver | ML algorithms, streaming data, energy demand forecasting | “Findings bring to light a need for further exploration in… synchronous prediction of energy using streaming data with machine learning models…” |
| Cost of IoT/Sensor Integration in Existing Buildings | The cost and complexity of installing smart meters, sensors, and IoT infrastructure in older building stock for retrofit readiness. | £/building, % of total retrofit cost, average system cost | *(Jradi, et al. 2023)* | Barrier | Vendor pricing, system compatibility issues, installation labour costs | “Sensing and metering devices are generally not available in existing buildings, and their integration is expensive and complicated.” |
| Integrated AI-IoT-DT Solutions | The degree to which Artificial Intelligence, Internet of Things, and Digital Twin technologies are jointly implemented for energy optimization and NZEB strategies. | Number of integrated projects; % of buildings with unified platforms; system maturity score | *(Elghaish, F. et al. 2024)* | Driver | IoT sensor deployment, AI analytics, Digital Twin infrastructure | “Addressing research gaps and integrating IoT, DT, and AI for achieving net-zero goals in the built environment is still in its early stages…” |
| Interoperability | The ability of various DT tools (BIM, IoT, FM platforms) to seamlessly share and integrate data across vendors, platforms, and system architectures. | % of devices/systems interoperable; # of platforms supported | *(Sobowale, M. et al. 2023)* | Barrier | Software integration reports, API compatibility, expert assessments | “The complexity of real-time data integration and interoperability were highlighted as part of the challenges” |
| Stakeholder Trust in Data Systems | The level of confidence stakeholders has in the safety, security, and privacy of operational and building data collected and processed by Digital Twin systems. | % compliance with GDPR or equivalent; # of reported breaches; stakeholder privacy confidence rating | *(Jradi, et al., 2023)* | Trust Driver / Barrier | Encryption protocols, access control systems, user surveys, legal frameworks | “Platform will provide building data acquisition… employing ICT infrastructure preserving privacy, security, and quality.” |
| DT Return on Investment (ROI) Period | The perceived economic feasibility of implementing Digital Twin technology in retrofitting projects, including expected ROI, capital investment, and payback periods | ROI (%), Payback Period (years), Investment per m² (£/m²) | *(Sobowale, M. et al. 2023)* | Barrier | Techno-economic case studies, policy reports, stakeholder interviews, investor evaluations | “Digital twin implementation has the potential for a 23-year return period for renewable technology for an existing building” |
| Digital Twin Process Standardisation | The availability and adoption of standardised, clearly defined procedures, guidelines, and roadmaps for implementing Digital Twin solutions in retrofit projects. | Number of national/industry standards, clarity index from stakeholder feedback, presence of roadmap documents | *(Sobowale, M. et al. 2023)* | Driver | Industry case studies, policy reports, technical standards | “The lack of a clear process roadmap is partially a factor… a roadmap is required to support decisions and policymakers to aid implementations.” |
